# Supplementary material for: Naphthalene dianhydride organic anode for a ‘rocking-chair’ zinc–proton hybrid ion battery
Source: Royal Society of Chemistry journal article supplement (doi:10.1039/d0dt04404k), 2021-01-01
Supplement: d0dt04404k1.pdf [file d0dt04404k1.pdf]

## Supporting Information

### **Naphthalene Dianhydride Organic Anode for ‘Rocking-Chair’ Zinc-Proton Hybrid Ion Battery**

Meena Ghosh,<sup>a,b</sup> Vidyanand Vijayakumar,<sup>a,b</sup> Maria Kurian,<sup>a</sup> Swati Dilwale,<sup>a,b</sup> and Sreekumar Kurungot\*<sup>a</sup>

<sup>a</sup>Physical and Materials Chemistry Division, CSIR-National Chemical Laboratory, Pune, 411008 Maharashtra, India. Email- k.sreekumar@ncl.res.in

<sup>b</sup>Academy of Scientific and Innovative Research, Sector 19, Kamla Nehru Nagar, Ghaziabad, Uttar Pradesh 201002, India.

**Table S1:** Crystal structure information of 1,4,5,8-naphthalenetetracarboxylic dianhydride (NTCDA).<sup>1</sup>

|                 |                                                                                                                                                       |
|-----------------|-------------------------------------------------------------------------------------------------------------------------------------------------------|
| Space group     | $P2_1/c$                                                                                                                                              |
| Crystal system  | Monoclinic                                                                                                                                            |
| Cell parameters | $a = 7.880 \text{ \AA}$ , $b = 5.322 \text{ \AA}$ , $c = 12.601 \text{ \AA}$ ,<br>$\alpha = 90^\circ$ , $\beta = 107.257^\circ$ , $\gamma = 90^\circ$ |

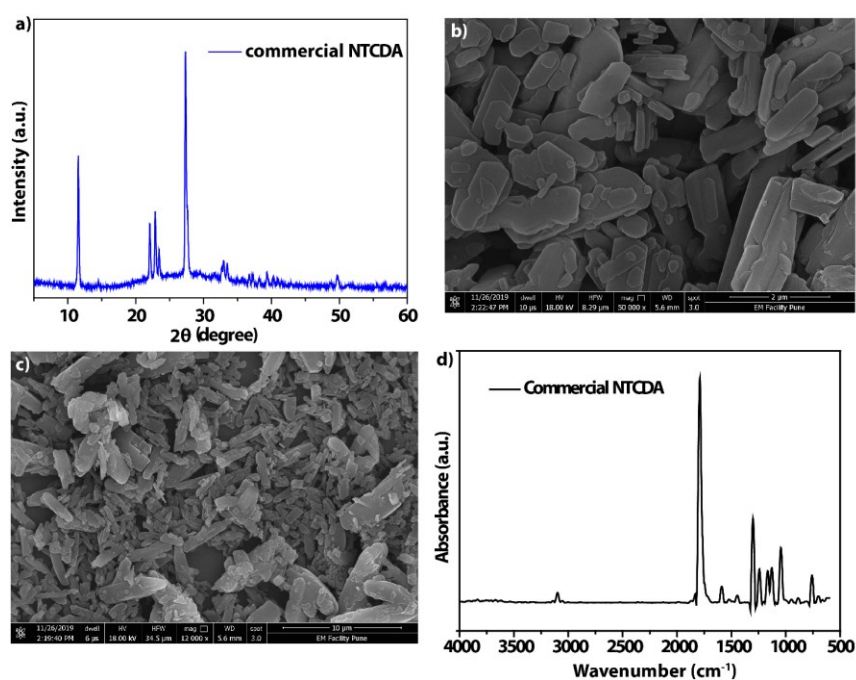

**Figure S1.** (a) XRD data and (b)-(c) FESEM images, (d) FTIR data of the commercial NTCDA.

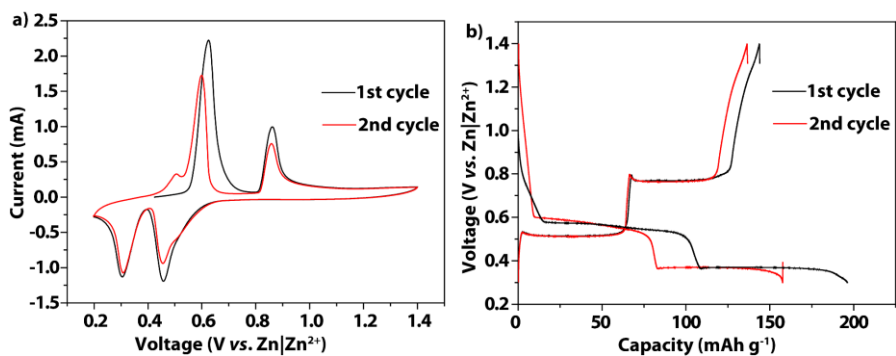

**Figure S2.** (a) CV profiles recorded at the scan rate of  $1.0 \text{ mV s}^{-1}$  and (b) GCD profiles recorded at the current rate of  $0.1 \text{ A g}^{-1}$  for the NTCDA||Zn cell.

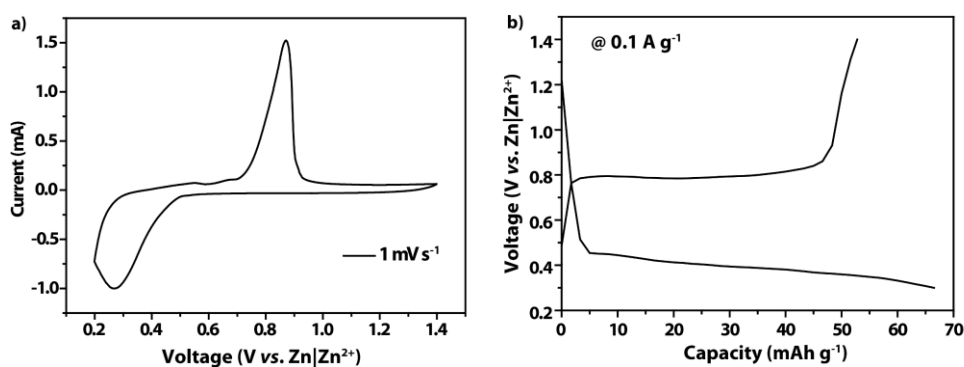

**Figure S3.** (a) CV profile recorded at the scan rate of  $1.0 \text{ mV s}^{-1}$  and (b) GCD profile recorded at the current rate of  $0.1 \text{ A g}^{-1}$  for the NTCDA||Zn-(O) cell in  $0.5 \text{ M ZnOTf/ACN}$  electrolyte.

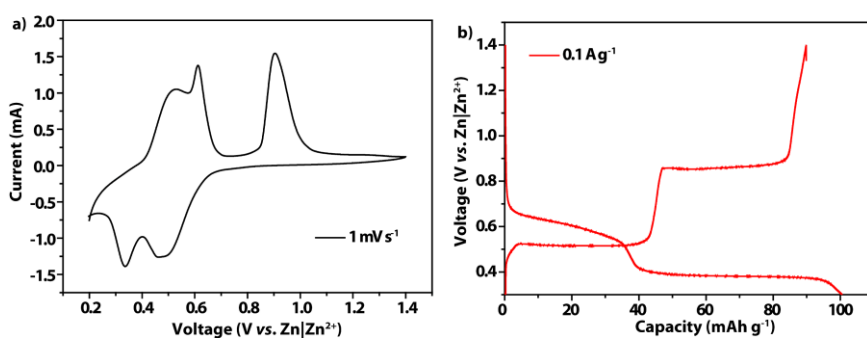

**Figure S4.** (a) CV profile recorded at the scan rate of  $1.0 \text{ mV s}^{-1}$  and (b) GCD profile recorded at the current rate of  $0.1 \text{ A g}^{-1}$  for the NTCDA||Zn-(A) cell in  $0.01 \text{ M H}_2\text{SO}_4$  electrolyte.

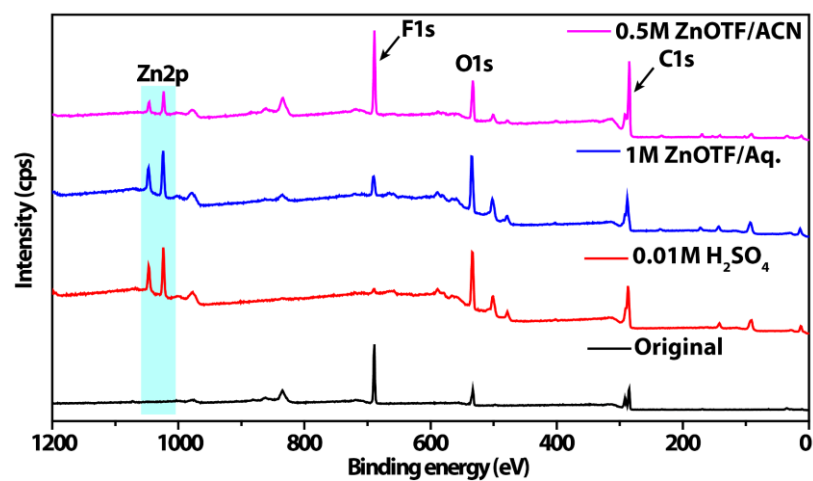

**Figure S5.** XPS survey spectra of the NTCDA electrodes at the original state and after recovering from the NTCDA||Zn-(N), NTCDA||Zn-(A), and NTCDA||Zn-(O) cells at the discharged state.

### Original

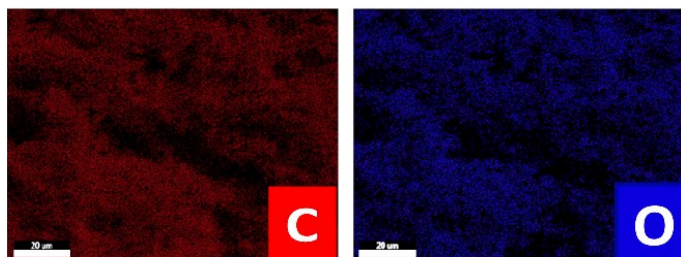

### Discharged

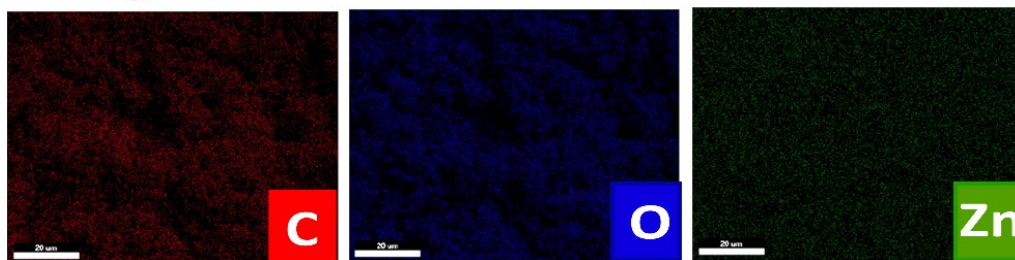

### Charged

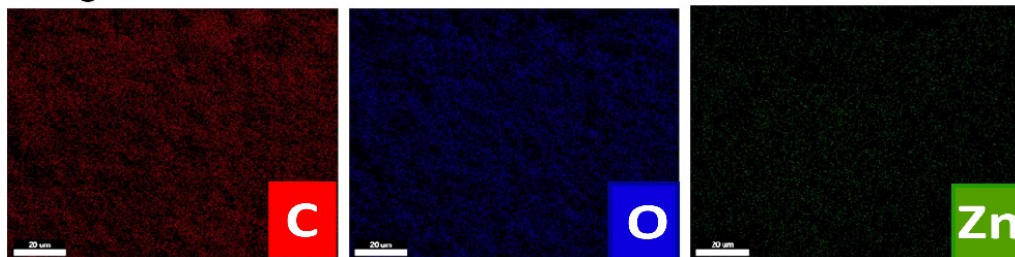

**Figure S6.** Elemental mapping of the NTCDA electrodes at the original state, and after recovering from the NTCDA||Zn-(N) half-cells at the discharged (0.30 V) and charged (1.4 V) states.

**Table S2.** Atomic percentage of the elements obtained from the EDAX analysis of the NTCDA electrodes recovered from the NTCDA||Zn-(N) half-cells.

|            | Carbon<br>(Atomic %) | Oxygen<br>(Atomic %) | Zinc<br>(Atomic %) |
|------------|----------------------|----------------------|--------------------|
| Original   | 71.4                 | 28.6                 | -                  |
| Discharged | 52.6                 | 39.4                 | 7.9                |
| Charged    | 58.4                 | 39                   | 2.5                |

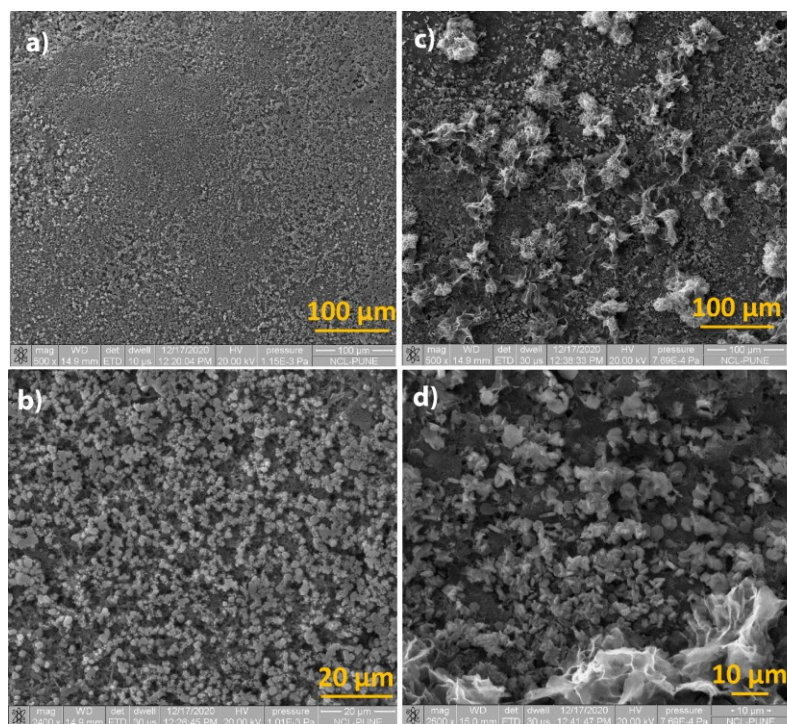

**Figure S7.** SEM image of NTCDA electrodes recovered from the NTCDA||Zn-(N) cell at the (a-b) discharged, and (c-d) charged states at different magnifications.

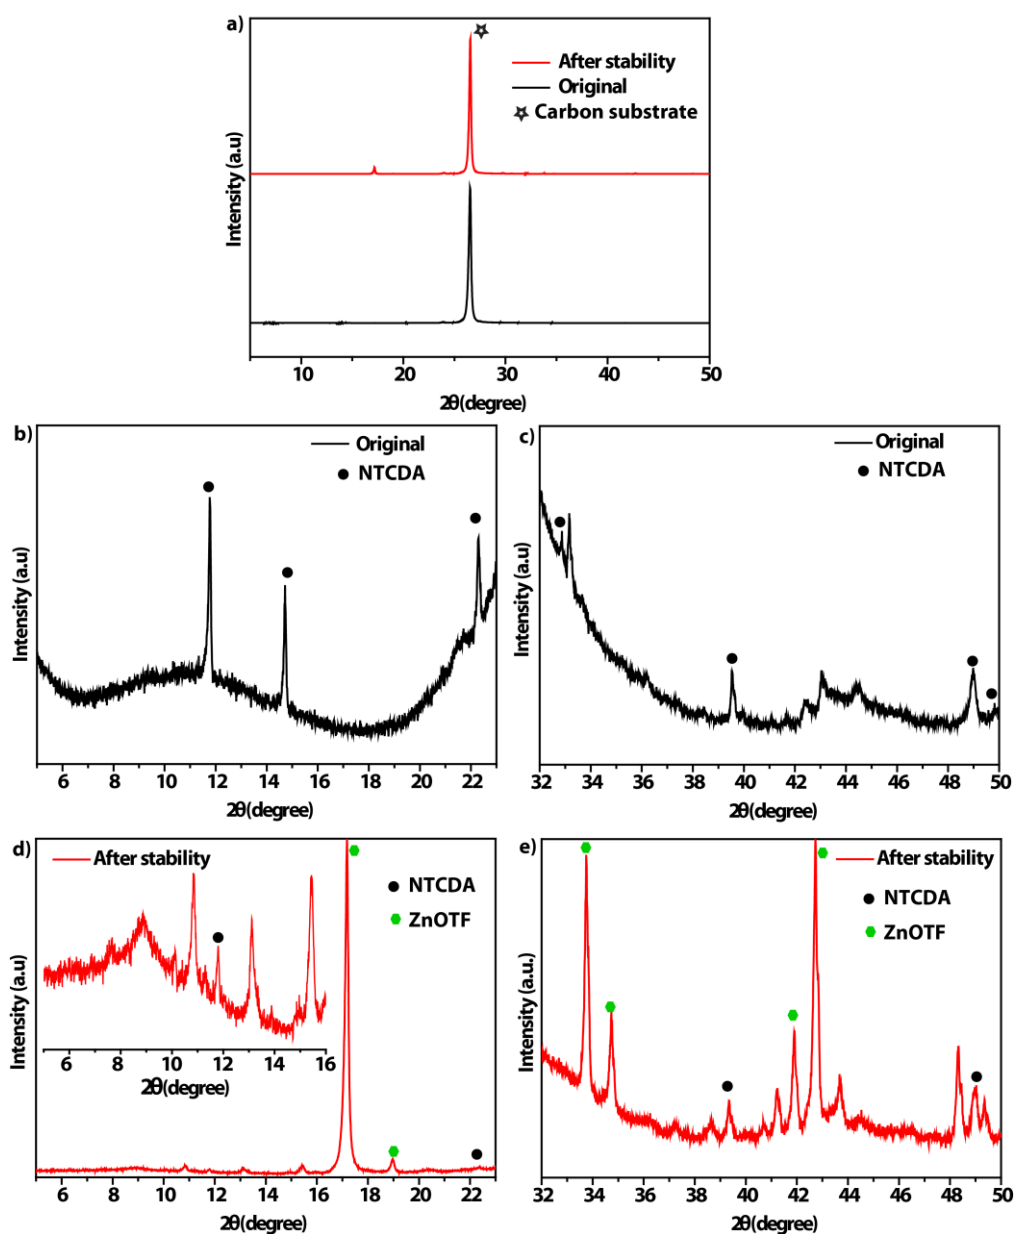

**Figure S8.** (a) XRD profiles of the NTCDA cathode recorded at the original state and after recovering from the post-cycled NTCDA||Zn(N) half-cell; (b)-(c) and (d)-(e) show the zoomed view of the XRD data of the original electrode and the post stability electrode (the electrode was washed with water and dried before the XRD analysis), respectively.

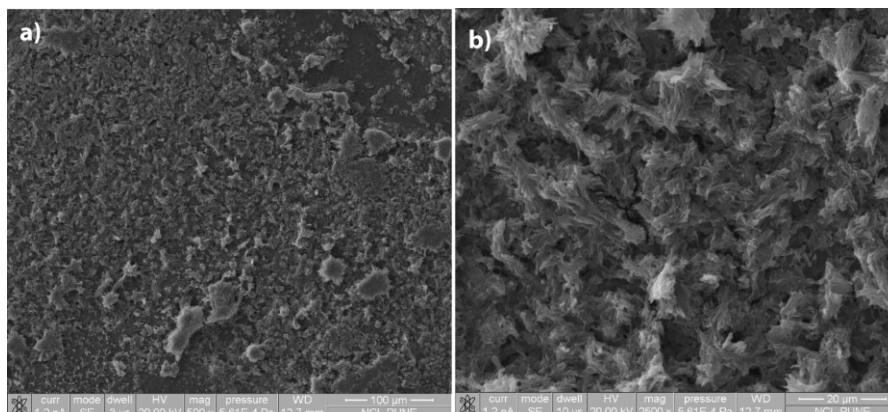

**Figure S9.** (a)-(b) SEM images of the NTCDA electrode recovered from the NTCDA||Zn-(N) half-cell after the cycling stability test (the electrode was washed with water and dried before the SEM analysis).

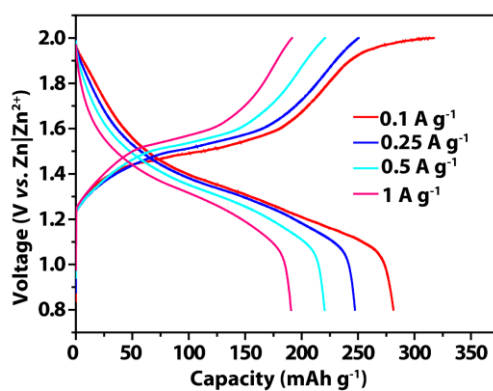

**Figure S10.** GCD profiles of the MnO<sub>2</sub>||Zn-(N) half-cell recorded at different current rates.

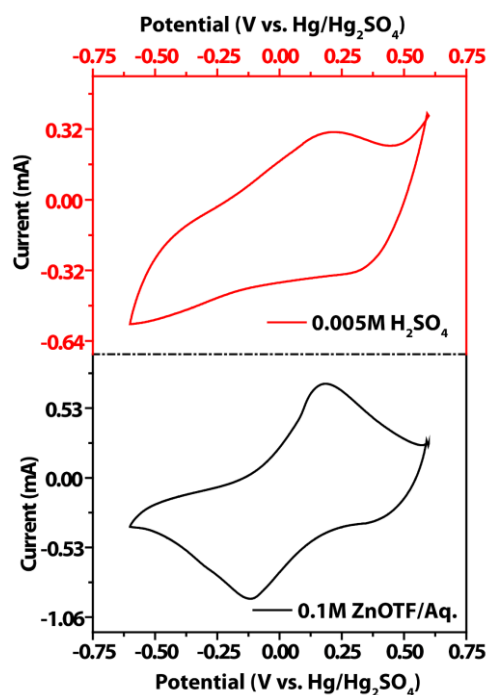

**Figure S11.** CV profiles for the  $\text{MnO}_2$  electrode characterized in the three-electrode cell with respect to the  $\text{Hg}/\text{Hg}_2\text{SO}_4$  reference electrode in 0.005M  $\text{H}_2\text{SO}_4$  and 0.1M  $\text{ZnOTF}/\text{Aq.}$  electrolytes.

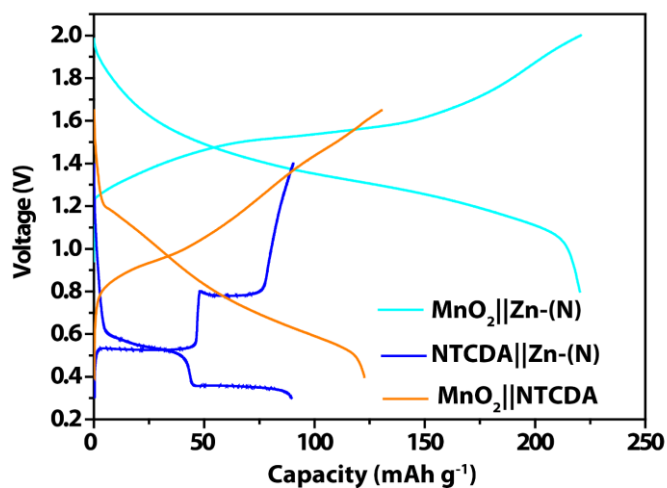

**Figure S12.** Charge/discharge capacities of the  $\text{MnO}_2||\text{Zn-(N)}$ ,  $\text{NTCDA}||\text{Zn-(N)}$ , and  $\text{MnO}_2||\text{NTCDA}$  cells recorded at the current rate of  $0.50 \text{ A g}^{-1}$  (here, the capacity values and current rate are normalized with respect to the mass-loading of the electrode material in the positive electrode).

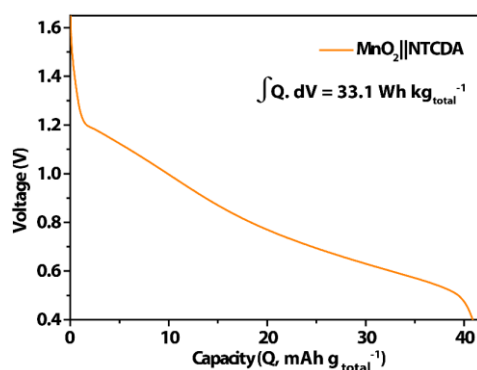

**Figure S13.** Voltage vs. discharge capacity plot of the MnO<sub>2</sub>||NTCDA full-cell recorded at a current rate of 0.17 A g<sub>total</sub><sup>-1</sup>.

The area under curve of the voltage vs. discharge capacity plot indicates the specific energy density based on the loading of the active material on cathode. The integrated area from Figure S13 is calculated to be 33.1 Wh kg<sub>total</sub><sup>-1</sup> and the corresponding discharge capacity is 41 mAh g<sub>total</sub><sup>-1</sup>. Therefore, the average voltage can be calculated from the following equation.

$$\text{Average voltage} = \frac{\text{Specific energy density}}{\text{Specific discharge capacity}} = \frac{33.1 \text{ Wh kg}_{\text{total}}^{-1}}{41 \text{ mAh g}_{\text{total}}^{-1}} = 0.80 \text{ V... (Equation S1)}$$

**Table S3.** The electrochemical performance parameters of NTCDA in the NTCDA||Zn half-cell and MnO<sub>2</sub>||NTCDA full-cell configurations are compared with the performance of some of the previously reported anode materials for ZIBs.

| Cathode  <br>Anode                                                         | Performance in half-cell                              |         |                      | Performance in full-cell                |                  |                           | Ref.<br>(Main<br>Text) |
|----------------------------------------------------------------------------|-------------------------------------------------------|---------|----------------------|-----------------------------------------|------------------|---------------------------|------------------------|
|                                                                            | Capacity<br>(current<br>rate)                         | Voltage | Cycling<br>stability | capacity                                | Voltage          | Cycling<br>stability      |                        |
| PB  <br>PTCDI/rGO                                                          | 141 mAh g <sup>-1</sup><br>(0.5 A g <sup>-1</sup> )   | 0.38 V  | 95% (1200<br>cycles) | 48 mAh g <sub>total</sub> <sup>-1</sup> | 0.95 V           | 75% (150<br>cycles)       | 27                     |
| ZnMn <sub>2</sub> O <sub>4</sub>   <br>Na <sub>0.14</sub> TiS <sub>2</sub> | 120 mAh g <sup>-1</sup><br>(0.1 A g <sup>-1</sup> )   | 0.30 V  | 77% (5000<br>cycles) | 38 mAh g <sub>total</sub> <sup>-1</sup> | 0.95 V           | 74% (100<br>cycles)       | 11                     |
| PB  <br>Zn <sub>2</sub> Mo <sub>6</sub> S <sub>8</sub>                     | ~60 mAh g <sup>-1</sup><br>(0.128 A g <sup>-1</sup> ) | 0.35 V  | -                    | 62 mAh g <sub>total</sub> <sup>-1</sup> | 1.40 V           | -                         | 28                     |
| MnO <sub>2</sub>   <br>PI-COF                                              | 92 mAh g <sup>-1</sup><br>(0.7 A g <sup>-1</sup> )    | -       | 85% (4000<br>cycles) | 60 mAh g <sub>total</sub> <sup>-1</sup> | ~0.90-<br>0.80 V | 82.5%<br>(2000<br>cycles) | 29                     |
| PB  <br>Ferrocene/C                                                        | 106 mAh g <sup>-1</sup><br>(1C)                       | -       | 70% (2000<br>cycles) | 30 mAh g <sub>total</sub> <sup>-1</sup> | 0.90 V           | 58%<br>(1000<br>cycles)   | 30                     |
| MnO <sub>2</sub>   <br>NTCDA                                               | 143 mAh g <sup>-1</sup><br>(0.1 A g <sup>-1</sup> )   | 0.46 V  | ~75% (300<br>cycles) | 41 mAh g <sub>total</sub> <sup>-1</sup> | 0.80 V           | ~60% (100<br>cycles)      | <b>This<br/>work</b>   |

## References

1. <https://www.ccdc.cam.ac.uk/structures/search?id=doi:10.5517/cc4bplq&sid=DataCite>.
